# Supplementary material for: The effect of compressed CO2 on the self-assembly of surfactants for facile preparation of ordered mesoporous carbon materials
Source: Royal Society of Chemistry journal article supplement (doi:10.1039/c7sm01839h), 2017-01-01
Supplement: c7sm01839h1.pdf [file c7sm01839h1.pdf]

## Supporting Information

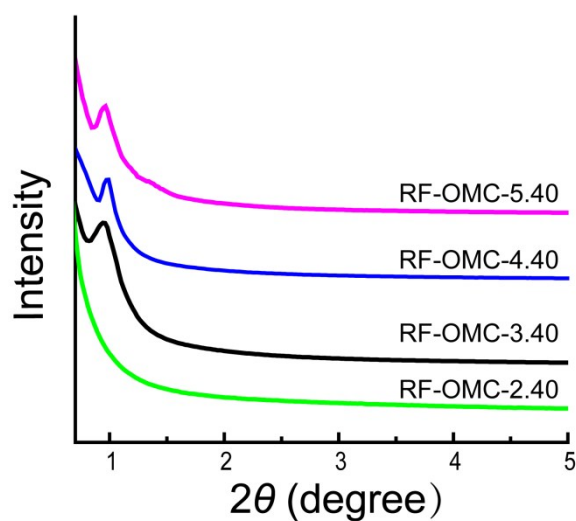

Figure S1. low-angle XRD patterns of RF-OMC.

Table S1. Characteristics of various carbon materials as supercapacitors electrode materials

| Materials                  | Specific capacitance<br>(F g <sup>-1</sup> ) | Ref.                                         |
|----------------------------|----------------------------------------------|----------------------------------------------|
| RF-OMC-4.40                | 142.5                                        | this work                                    |
| OMC                        | 109.1                                        | Nanoscale, 2016, 8, 15671–15680              |
| MCNs                       | 98-142                                       | J. Colloid Interf. Sci., 2012,<br>377169–175 |
| OMC                        | 100                                          | Chem. Mater., 2008, 20, 7195–<br>7200        |
| Tubular carbon<br>nanorods | 132                                          | J. Mater. Chem. A, 2013, 1,<br>12198–12205   |
